# Supplementary material for: The Effect of the Pre-Strain Process on the Strain Engineering of Two-Dimensional Materials and Their van der Waals Heterostructures
Source: MDPI journal article supplement (doi:10.3390/nano13050833), 2023-02-23
Supplement: s1 [file s1]

# The Effect of the Pre-Strain Process on the Strain Engineering of Two-Dimensional Materials and Their van der Waals Heterostructures

Jinkun Han <sup>1</sup>, Xiaofei Yue <sup>1</sup>, Yabing Shan <sup>1</sup>, Jiajun Chen <sup>1</sup>, Borgea G. M. Ekoya <sup>1</sup>, Laigui Hu <sup>1</sup>, Ran Liu <sup>1</sup>, Zhijun Qiu <sup>1,\*</sup> and Chunxiao Cong <sup>1,2,\*</sup>

<sup>1</sup> State Key Laboratory of ASIC and System, School of Information Science and Technology, Fudan University, Shanghai 200433, China

<sup>2</sup> Yiwu Research Institute of Fudan University, Chengbei Road, Yiwu City 322000, China

\* Correspondence: zjqiu@fudan.edu.cn (Z.Q.); cxcong@fudan.edu.cn (C.C.)

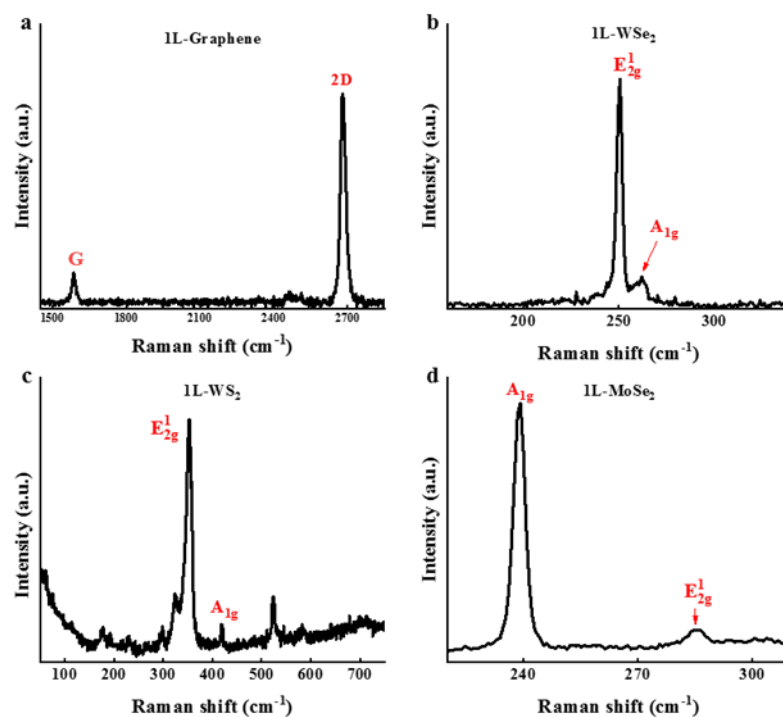

Figure S1. (a–d) Raman spectrum for 1L-graphene, 1L-WSe<sub>2</sub>, 1L-Ws<sub>2</sub>, 1L-MoSe<sub>2</sub>.

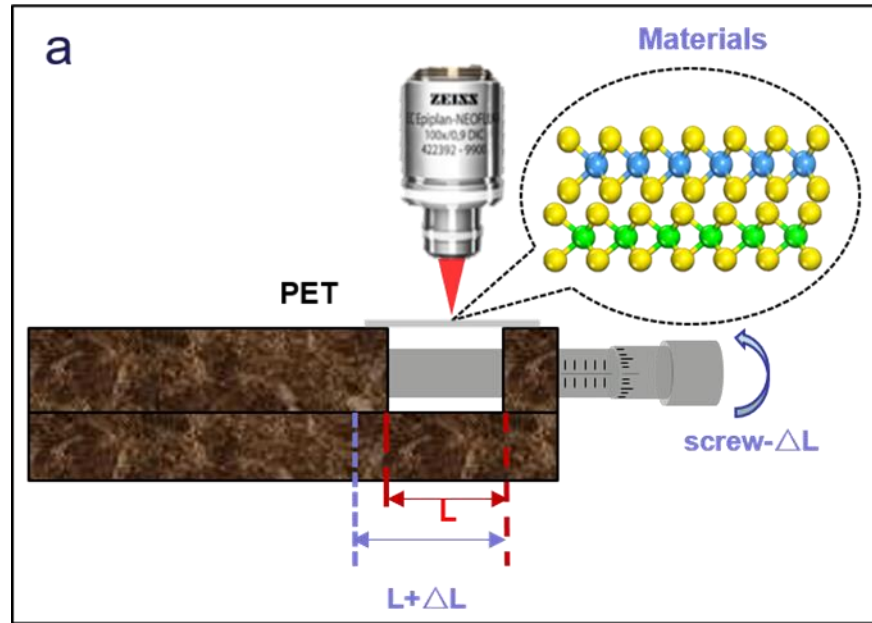

**Figure S2.** (a) Strain modulation schematic for  $\text{WS}_2/\text{WS}_2$  and  $\text{WS}_2/\text{MoSe}_2$  heterostructure.

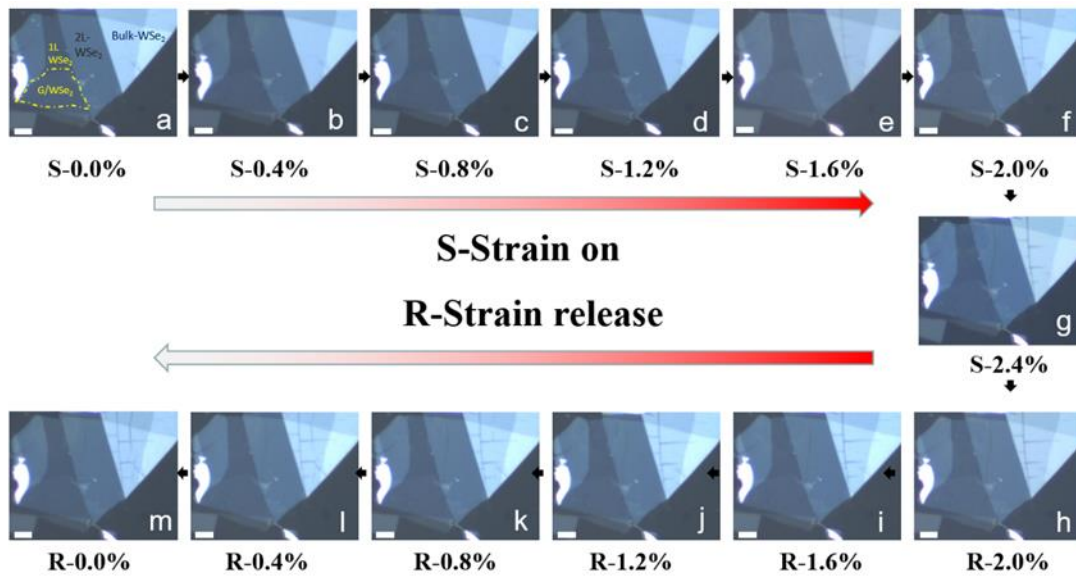

**Figure S3.** (a-m) Optical view of 1L- $\text{WSe}_2$  and graphene/ $\text{WSe}_2$  heterostructure during strain on and release process from 0-2.4%.
